# Supplementary material for: Exploring the solubility and solvation thermodynamics of coumarin in a range of aqua-organic solvents
Source: Royal Society of Chemistry journal article supplement (doi:10.1039/d3nj02412a), 2023-01-01
Supplement: d3nj02412a1.pdf [file d3nj02412a1.pdf]

## *Supporting Information*

### **Exploring the Solubility and Solvation Thermodynamics of Coumarin in a Range of Aqua-Organic Solvents**

Sintu Ganai<sup>a,\*</sup>, Puspall Mukherjee<sup>a</sup>, Kalachand Mahali<sup>b</sup>, Avishek Saha<sup>a,c</sup>, Aslam Hossain<sup>d</sup>, AV Soldatov<sup>d</sup>, A.M.A. Henaish<sup>e,f</sup>, Jahangeer Ahmed<sup>g</sup>, Sanjay Roy<sup>a,\*</sup>,

<sup>a</sup>Department of Chemistry, School of Sciences, Netaji Subhas Open University, West Bengal, India

<sup>b</sup>Department of Chemistry, University of Kalyani, Kalyani- 741235, Nadia, India

<sup>a,c</sup> Department of Chemistry, Srikrishna College, Bagula, Nadia, Pin- 741502, West Bengal, India

<sup>d</sup>Smart Materials Research Institute, Southern Federal University, Sladkova 178/24, 344090, Rostov-on-Don, Russia

<sup>e</sup>Physics Department, Faculty of Science, Tanta University, Tanta 31527, Egypt

<sup>f</sup>NANOTECH Center, Ural Federal University, Ekaterinburg 620002, Russia

<sup>g</sup>Department of Chemistry, College of Science, King Saud University, P.O. Box 2455, Riyadh 11451, Saudi Arabia

---

Corresponding Emails:

S. Roy: [sanjayroy@gmail.com](mailto:sanjayroy@gmail.com); ORCID: <https://orcid.org/0000-0001-6841-4961>

S. Ganai: [sintuganaisosc@wbnsou.ac.in](mailto:sintuganaisosc@wbnsou.ac.in); ORCID: <https://orcid.org/0009-0004-2026-3307>

## **1. Theoretical**

### **1.1 Calculations of thermodynamic parameters**

The Gibbs energy of solutions ( $\Delta G_{sol}^0(i)$ ) (shown in Table 3) on a molal scale for different solvent mixtures at various temperatures was calculated using equation 2, similar to previous studies [1-3].

$$\Delta G_{sol}^0(i) = -RT \ln S \quad (2)$$

In this theoretical study, the experimental saturated solubility of coumarin is denoted by 'S' and measured in mol·kg<sup>-1</sup>. It is important to emphasize that the mole fractions of coumarin in different compositions of the aqueous DMF/DMSO/ACN solvent systems, as determined from the solubility values presented in Table 2, are found to be negligibly small. Additionally, the activity coefficients of non-polar coumarin in these solvent systems are assumed to be unity, a common practice for non-electrolytes and organic solvent systems [1, 3]. This assumption is

considered reasonable due to the insignificance of the factor involving the ratio of activity coefficients (represented as 'sol' for the aqueous solution of DMF/DMSO/ACN) in determining transfer free energies, which is the primary focus of our investigation. It is expected that this factor has a negligible impact on the transfer free energies due to the small values associated with it.

To get the precise value of  $\Delta G_{sol}^0(i)$  and to count the effect of temperature on  $\Delta G_{sol}^0(i)$  the method of least squares is used in the form of equation 3 [1, 3].

$$\Delta G_{sol}^0(i) = a + bT + cT \ln T \quad (3)$$

where T is the temperature in Kelvin scale. The values of coefficients a, b, and c are shown in Table 4. Transfer Gibbs energies,  $\Delta G_t^0$  and entropies  $\Delta S_t^0$  of coumarin molecules from H<sub>2</sub>O to H<sub>2</sub>O-DMF/DMSO/ACN mixtures were calculated at 298.15 K on mole fraction scale by using the following equations 4, 5 & 6.

$$\Delta G_t^0(i) = {}_s\Delta G_{sol}^0(i) - {}_R\Delta G_{sol}^0(i) \quad (4)$$

$$\text{i.e. } \Delta G_t^0(i) = (a_s - a_R) + (b_s - b_R)T + (c_s - c_R)T \ln T - RT \ln(M_s / M_R) \quad (5)$$

and

$$\Delta S_t^0(i) = (b_R - b_s) + (c_R - c_s)(1 + \ln T) + R \ln(M_s / M_R) \quad (6)$$

here the subscript 's' for H<sub>2</sub>O /DMF/DMSO/ACN mixtures, 'R' for H<sub>2</sub>O, M<sub>s</sub> and M<sub>R</sub> is the molar mass of the H<sub>2</sub>O +DMF/DMSO/ACN and pure H<sub>2</sub>O respectively. The computed  $\Delta G_t^0(i)$  and  $T\Delta S_t^0(i)$  values of coumarin are offered in Table 4 & 5. The calculated values show uncertainties in  $\Delta G_t^0(i)$  and  $\Delta S_t^0(i)$  are about  $\pm 0.07 \text{ kJ}\cdot\text{mol}^{-1}$  and  $2.5 \text{ kJ}\cdot\text{mol}^{-1}$ , respectively.

Now  $\Delta E_t^0(i)$  (where E=G or S) may be ascribed as the sum of the following terms (assuming dipole induced dipole term to be very small)[4].

$$\text{i.e. } \Delta E_t^0(i) = \Delta E_{t,cav}^0(i) + \Delta E_{t,d-d}^0(i) + \Delta E_{t,ch}^0(i) \quad (7)$$

In this study, we consider the transfer energy contribution of two main effects: the cavity effect ( $\Delta E_{t,cav}^0(i)$ ) and the dipole-dipole interaction effect ( $\Delta E_{t,d-d}^0(i)$ ). The cavity effect accounts for the energy associated with the creation of cavities required for introducing coumarin into both pure water (H<sub>2</sub>O) and water mixed with DMF/DMSO/ACN solvents. The dipole-dipole interaction effect represents the energy resulting from the interactions between coumarin and the

solvent molecules. Additionally,  $\Delta X_{t,cav}^0(i)$  includes all other effects, such as those originating from short-range dispersion interactions, hydrophilic or hydrophobic hydration, and structural effects. Here  $\Delta X_{t,cav}^0(i)$  values are computed by well established Scaled particle theory (SPT) of R.A. Pierotti [4, 5]. In this theory, the solute molecule (coumarin) and solvent molecules are treated as equivalent hard-sphere models, with their respective diameters considered as important parameters [6]. Here the hard-sphere diameter for mixed solvent,  $\sigma_s$  for a particular composition of solvent mixture is calculated according to Graziano [7] (Table S1):

The determination of the hard-sphere diameter ( $\sigma_s$ ) for a particular composition of the solvent mixture is essential for our study. To achieve this, we employ the methodology proposed by Graziano [7]. The detailed calculation procedure and results can be found in Table S1, which is provided as supplementary material accompanying this study. By applying the approach outlined in Graziano's work, we are able to calculate the appropriate hard-sphere diameter ( $\sigma_s$ ) specifically tailored for the mixed solvent system under investigation. This diameter parameter plays a crucial role in our analysis and allows us to accurately account for the characteristics and interactions within the solvent mixture.

$\sigma_s = \text{mole fraction of water} \times \text{hard-sphere diameter of water} + \text{mole fraction of DMF/DMSO/ACN} \times \text{hard-sphere diameter of DMF/DMSO/ACN}.$

Now replacing actual term of E we have calculated  $\Delta G_{d-d}^0(i)$  and  ${}_s\Delta S_{d-d}^0(i)$  using Keesom-orientation expression[8] as:

$$\Delta G_{t,d-d}^0(i) = ({}_s\Delta G_{d-d}^0(i) - {}_R\Delta G_{d-d}^0(i)) \quad (8)$$

$$\text{and } {}_s\Delta S_{t,d-d}^0(i) = ({}_s\Delta S_{d-d}^0(i) - {}_R\Delta S_{d-d}^0(i)) \quad (9)$$

For  ${}_s\Delta G_{d-d}^0(i)$  in a solvent S, as given below:

$${}_s\Delta G_{d-d}^0(i) = -(8\Pi/9)N^2\mu_s^2\mu_x^2\sigma_{s-x}^{-3}(kT)^{-1}V_s^{-1} = A/TV_s \quad (10)$$

Where  $A = -(8\Pi/9)N^2\mu_s^2\mu_x^2\sigma_{s-x}^{-3}(k)^{-1}$

$\Pi = 22/7$ ,  $V_s = M_s/d_s$  = molar volume of solvent,  $M_s$  = molar mass of binary solvent,  $d_s$  = density of binary solvent,  $k$  = Boltzmann constant.  $N$  = Avogadro's number,  $\mu_s, \mu_x$  are the dipole moment of binary solvent and coumarin molecules respectively (Table 5 & Table S1).

The dipole moment of the mixed binary solvent system in a particular composition is calculated as[6]:  $\mu_s = \mu \text{ of reference solvent (H}_2\text{O)} \times \text{mole fraction of H}_2\text{O} + \mu \text{ of co-solvent (DMF/DMSO/ACN)} \times \text{mole fraction of co-solvent (DMF/DMSO/ACN)}$ .

$\sigma_{s-x}$  represents the distance at which the attractive and repulsive interactions between the solvent and solute molecules are equal and is generally equal to  $\frac{1}{2}(\sigma_s + \sigma_x)$  where  $\sigma_s$  and  $\sigma_x$  are the hard sphere diameters of binary solvent and coumarin respectively (Table S1)

Here  $\Delta S_{d-d}^0(i)$  can be written as follows:

$$_s \Delta S_{d-d}^0(i) = -\{\delta_s \Delta G_{d-d}^0(i) / \delta T\}_p \quad (11)$$

$$\text{i.e. } T_s \Delta S_{d-d}^0(i) = {}_s \Delta G_{d-d}^0(i) [1 + T\alpha] \quad (12)$$

where  $\alpha$  is the isobaric thermal coefficient<sup>23</sup> of the mixed solvent and represented by eq 13 as:

$$\alpha = (\delta \ln V_s / \delta T)_p = -(\delta \ln d_s / \delta T) \quad (13)$$

As in the earlier studies[4, 7, 9], in order to get the  $\Delta E_{t,d-d}^0(i)$  term on the mole fraction scale,  $\Delta E_{t,d-d}^0(i)$  was again multiplied by  $X_{sl}$ , which is the actual mole fraction of the organic binary solvent in the vicinity of the coumarin for the contribution of dipole-dipole interaction which was estimated using the equation 14 as follow[4];

$$X_{sl} = X_s (\mu_s / \sigma_s^3) / (\mu_R / \sigma_R^3) \quad (14)$$

On the other hand  $\Delta E_{t,ch}^0(i)$  values of amino acids were calculated after the subtraction of  $\Delta E_{t,cav}^0(i)$  and  $\Delta E_{t,d-d}^0(i)$  from the total i.e.  $\Delta E_t^0(i)$ . The values of  $\Delta E_{t,cav}^0(i)$ ,  $\Delta E_{t,d-d}^0(i)$  and  $\Delta E_{t,ch}^0(i)$  are presented in Table 5.

**Table S1. Solvent parameters (mole fraction of cosolvent ( $z_s$ ), water ( $z_R$ ), apparent mol. weight of electrolyte solvent ( $M_s$ ), apparent density ( $d_s$ ), apparent molar volume ( $V_s$ ), apparent solvent diameter ( $\sigma_s$ ),  $\sigma_{s-x}$ ,  $\mu_s$ , and apparent isobaric thermal coefficients ( $\alpha$ ) and apparent dipole moment (D) of the H<sub>2</sub>O +DMF/DMSO/ACN systems at 298.15 K<sup>#</sup>**

| Wt % of solvent (s)   | Mole fraction ( $z_s$ ) | Mole fraction ( $z_R$ ) | Molar mass ( $M_s$ ) ( $\text{g}\cdot\text{mol}^{-1}$ ) | $10^3 d_s$ ( $\text{kg}\cdot\text{m}^{-3}$ ) | $\sigma_{s-x}$ (nm) | $\sigma_s$ (nm) | Dipole Moment ( $\mu_s$ ) (Debye) | $\alpha$ ( $\times 10^{-3}$ ) ( $\text{K}^{-1}$ ) |
|-----------------------|-------------------------|-------------------------|---------------------------------------------------------|----------------------------------------------|---------------------|-----------------|-----------------------------------|---------------------------------------------------|
| 100% H <sub>2</sub> O | 1.0000                  | 0.0000                  | 18.0153                                                 | 0.9970                                       | 0.3500              | 0.2740          | 1.8310                            | 0.257                                             |
| 20% DMF               | 0.9420                  | 0.0580                  | 21.2096                                                 | 0.9939                                       | 0.3565              | 0.2870          | 2.0277                            | 0.301                                             |
| 40% DMF               | 0.8589                  | 0.1411                  | 25.7863                                                 | 0.9895                                       | 0.3658              | 0.3056          | 2.2813                            | 0.363                                             |
| 60% DMF               | 0.7301                  | 0.2699                  | 32.8800                                                 | 0.9827                                       | 0.3803              | 0.3345          | 2.6206                            | 0.459                                             |
| 80% DMF               | 0.5035                  | 0.4965                  | 45.3599                                                 | 0.9707                                       | 0.4056              | 0.3852          | 3.0982                            | 0.631                                             |
| 100% DMF              | 0.0000                  | 1.0000                  | 73.0900                                                 | 0.9440                                       | 0.4620              | 0.4980          | 3.8200                            | 1.009                                             |
| 100% H <sub>2</sub> O | 1.0000                  | 0.0000                  | 18.0153                                                 | 0.9970                                       | 0.3500              | 0.2740          | 1.8310                            | 0.257*                                            |
| 20%DMSO               | 0.9455                  | 0.0545                  | 21.2913                                                 | 0.9939                                       | 0.3559              | 0.2858          | 1.9438                            | 0.296                                             |
| 40%DMSO               | 0.8668                  | 0.1332                  | 26.0223                                                 | 0.9895                                       | 0.3645              | 0.3029          | 2.1066                            | 0.353                                             |
| 60%DMSO               | 0.7430                  | 0.2570                  | 33.4646                                                 | 0.9827                                       | 0.3779              | 0.3298          | 2.3627                            | 0.442                                             |
| 80%DMSO               | 0.5202                  | 0.4798                  | 46.8582                                                 | 0.9707                                       | 0.4021              | 0.3781          | 2.8237                            | 0.602                                             |
| 100%DMSO              | 0.0000                  | 1.0000                  | 78.1300                                                 | 0.9440                                       | 0.4585              | 0.4910          | 3.9000                            | 0.982                                             |
| 100% H <sub>2</sub> O | 1.0000                  | 0.0000                  | 18.0153                                                 | 0.9970                                       | 0.3500              | 0.2740          | 1.8310                            | 0.257*                                            |
| 20% ACN               | 0.9011                  | 0.0989                  | 20.2934                                                 | 0.9761                                       | 0.3568              | 0.2876          | 1.9901                            | 0.369                                             |
| 40% ACN               | 0.7736                  | 0.2264                  | 23.2304                                                 | 0.9490                                       | 0.3656              | 0.3051          | 2.1953                            | 0.513                                             |
| 60% ACN               | 0.6030                  | 0.3970                  | 27.1599                                                 | 0.9131                                       | 0.3774              | 0.3288          | 2.4698                            | 0.706                                             |
| 80% ACN               | 0.5326                  | 0.4674                  | 28.7816                                                 | 0.8983                                       | 0.3823              | 0.3385          | 2.8561                            | 0.786                                             |
| 100% ACN              | 0.0000                  | 1.0000                  | 41.0500                                                 | 0.7860                                       | 0.4190              | 0.4120          | 3.4400                            | 1.388                                             |

$u(T)^{\#} = 0.10 \text{ K}$  [u for standard uncertainty]; Coumarin has a diameter of 0.456 nm and a dipole moment of 5.257 Debye [DFT data, 10]. The hard sphere diameters of DMF, DMSO, ACN, and water are 0.498 nm, 0.491 nm, 0.412 nm, and 0.274 nm, respectively [11, 12, 13]. The dipole moments of DMF, DMSO, ACN, and water are 3.82 D, 3.90 D, 3.45 D, and 1.831 D, respectively [22, 29]. Furthermore, the isobaric thermal coefficient of DMF, DMSO, ACN, and water are  $1.009 \times 10^{-3}$ ,  $0.982 \times 10^{-3}$ ,  $1.388 \times 10^{-3}$ , and  $0.257 \times 10^{-3}$ , respectively [13,14].

## 1.2 Density Functional Theory:

Structure of coumarin, was optimized in density functional theory (DFT) using the Gaussian 09 software [10] Computation was performed using B3LYP hybrid functional and 6-31G+(d,p) basis set. The ball and stick model of the ground state optimized geometries has been represented in Fig 1.

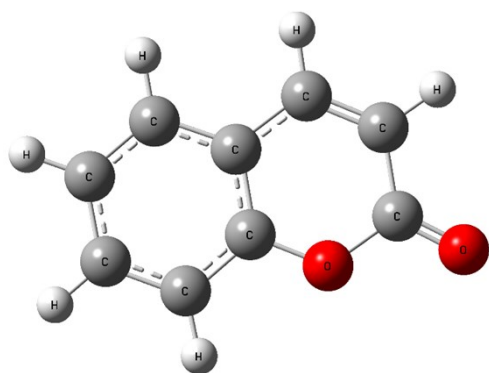

Calculation Type = FOPT  
Version: Gaussian 09W software  
Calculation Method = RB3LYP  
Basis Set = 6-31+G(d,p)  
Charge = 0  
Spin = Singlet  
Total Energy (RB3LYP) = -497.05238818 a.u.  
RMS Gradient Norm = 0.00000343 a.u.  
Dipole Moment = 5.2567 Debye  
Point Group = C1

**Fig S1.** Structure of coumarin determined by Density Functional Theory.

## 1.3. UV-Vis spectrum:

The absorption spectrum of coumarin in water, Acetonitrile, DMF, DMSO shows two absorption maxima in the wavelength range 270-275 nm and 310-312 nm. From the comparative UV-Vis spectrum of coumarin in water, pure solvents and aqueous solvents (Fig.S2a-S2c), it is clear that absorption peaks at 270-275 and 310-312 nm remain almost unaltered which is indicative of the fact that there is no specific chemical change during the transfer of solid coumarin into the solution phase. Slight changes in the peak position and intensity appeared due to different polarity of the solvents used. It is important to mention here that the clean absorption spectrum in various solvent system also support the purity of the understudying compound.

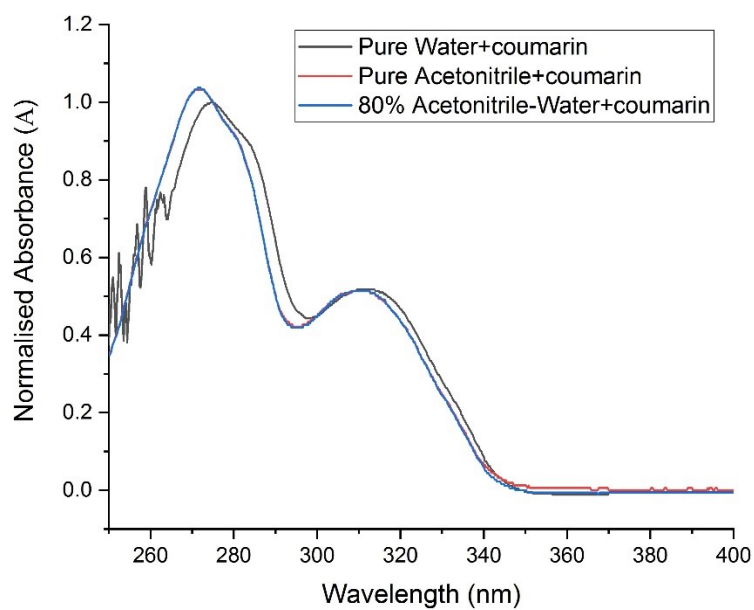

**Figure S2(a).** Comparative UV-Vis spectrum of coumarin in water, pure acetonitrile and aqueous acetonitrile (ACN)

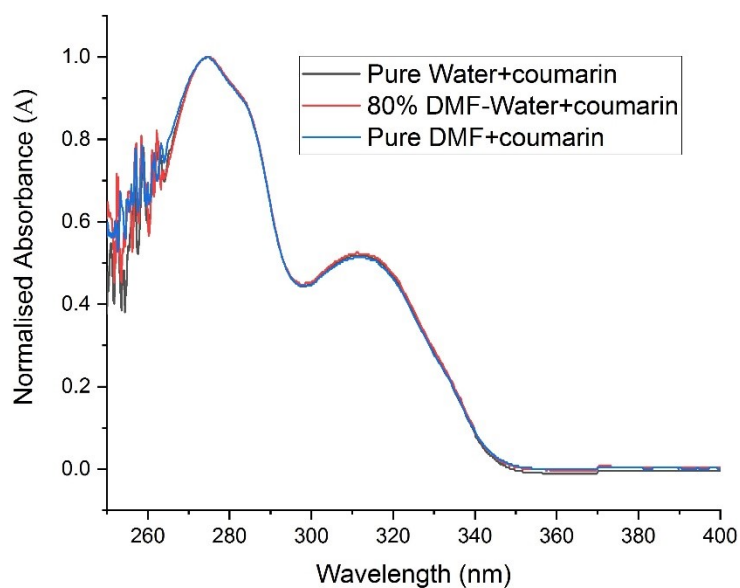

**Figure S2(b).** Comparative UV-Vis spectrum of coumarin in water, pure DMF and aqueous DMF

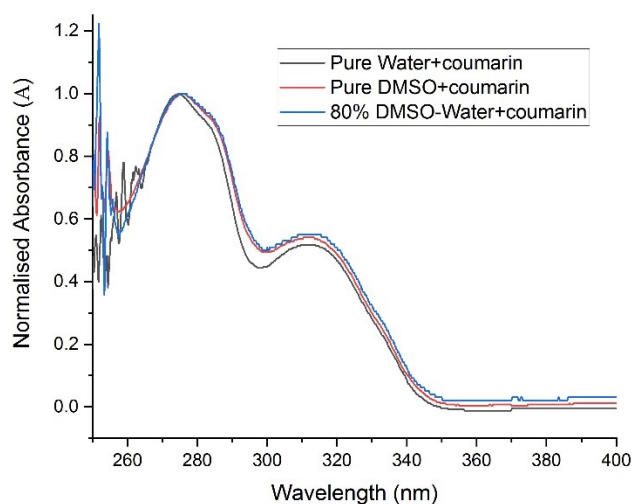

**Figure S2(c).** Comparative UV-Vis spectrum of coumarin in water, Pure DMSO and aqueous DMSO

### 1.3 Mole Fraction Solubility of Coumarin in Aqueous-Organic Solvent System

Mole fraction solubility of coumarin in aqueous -DMF, aqueous-DMSO and aqueous-ACN at different temperatures was calculated as follows:

$$\text{Mole fraction solubility } (x_s) = (m_1/M_1)/(m_1/M_1 + m_2/M_2 + m_3/M_3) \quad (1)$$

where, 1, 2 and 3 refer to coumarin, water and DMF/DMSO/ACN solvents, respectively. Here  $m_1$  and  $M_1$  are the solubility of coumarin in gram and the molar mass of coumarin,  $m_2$  and  $M_2$  weight taken, and molar mass of water, and  $m_3$  and  $M_3$  weight taken, and molar mass of DMF/DMSO/ACN solvents, respectively.

**Table S2.** Solubility of coumarin in aqueous -DMF, aqueous-DMSO and aqueous-ACN at different temperatures in mole fraction scale of solvent mixtures at pressure 0.1MPa<sup>b</sup>

| Mole fraction<br>[cosolvents] | Mole fraction solubility ( $x_s$ ) x 10 <sup>3</sup> |                       |                       |                       |                       |
|-------------------------------|------------------------------------------------------|-----------------------|-----------------------|-----------------------|-----------------------|
|                               | 288.15 K <sup>#</sup>                                | 293.15 K <sup>#</sup> | 298.15 K <sup>#</sup> | 303.15 K <sup>#</sup> | 308.15 K <sup>#</sup> |
| <b>X<sub>DMF</sub></b>        |                                                      |                       |                       |                       |                       |
| 0.0000                        | 0.095                                                | 0.205                 | 0.322                 | 0.351                 | 0.546                 |

|        |         |         |         |         |         |
|--------|---------|---------|---------|---------|---------|
| 0.0580 | 1.021   | 1.244   | 1.785   | 2.419   | 2.716   |
| 0.1411 | 4.574   | 5.011   | 6.841   | 8.942   | 9.254   |
| 0.2699 | 15.847  | 20.427  | 29.768  | 40.352  | 41.009  |
| 0.4965 | 85.371  | 93.002  | 113.634 | 143.273 | 147.951 |
| 1.0000 | 228.141 | 240.154 | 260.277 | 283.003 | 283.224 |

**x<sub>DMSO</sub>**

|        |         |         |         |         |         |
|--------|---------|---------|---------|---------|---------|
| 0.0000 | 0.095   | 0.205   | 0.322   | 0.351   | 0.546   |
| 0.0545 | 0.262   | 0.504   | 0.670   | 0.791   | 1.025   |
| 0.1332 | 0.739   | 1.229   | 1.697   | 1.943   | 2.396   |
| 0.2570 | 2.657   | 4.126   | 5.921   | 6.414   | 7.048   |
| 0.4798 | 30.783  | 42.983  | 56.555  | 70.542  | 77.815  |
| 1.0000 | 137.689 | 232.832 | 251.245 | 273.095 | 278.922 |

**x<sub>ACN</sub>**

|        |         |         |         |         |         |
|--------|---------|---------|---------|---------|---------|
| 0.0000 | 0.095   | 0.205   | 0.322   | 0.351   | 0.546   |
| 0.0989 | 0.402   | 0.623   | 0.935   | 1.222   | 1.414   |
| 0.2264 | 1.030   | 1.169   | 1.628   | 2.096   | 22.906  |
| 0.3970 | 1.670   | 2.765   | 28.448  | 31.382  | 51.526  |
| 0.4674 | 71.460  | 83.355  | 86.637  | 89.158  | 92.239  |
| 1.0000 | 109.270 | 117.374 | 131.882 | 134.977 | 153.003 |

$u(T)^{\#} = 0.10 \text{ K}$  [u for standard uncertainty]; and  $u_r(S) = 0.001$  and  $u_r(p)^b = 0.02 \text{ MPa}$   
[ $u_r$  = relative uncertainty]

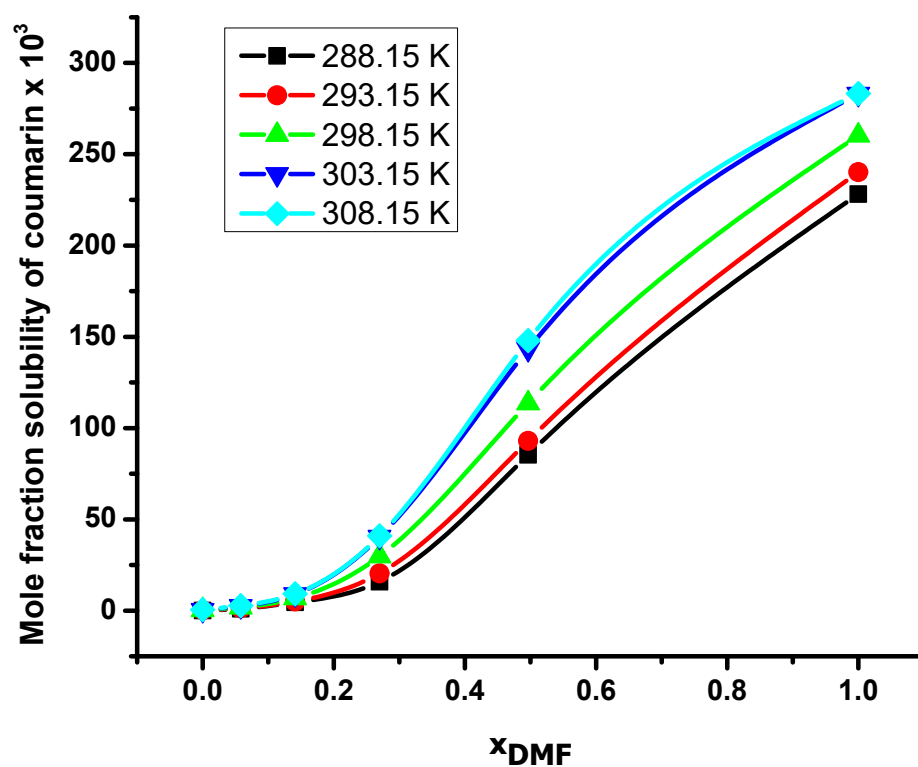

Figure S 3(a) Mole fraction solubility of coumarin in various temperatures (288.15 to 308.15 K) in pure water and with the variation of mole fraction concentration of *N,N*-dimethylformamide ( $x_{\text{DMF}}$ ).

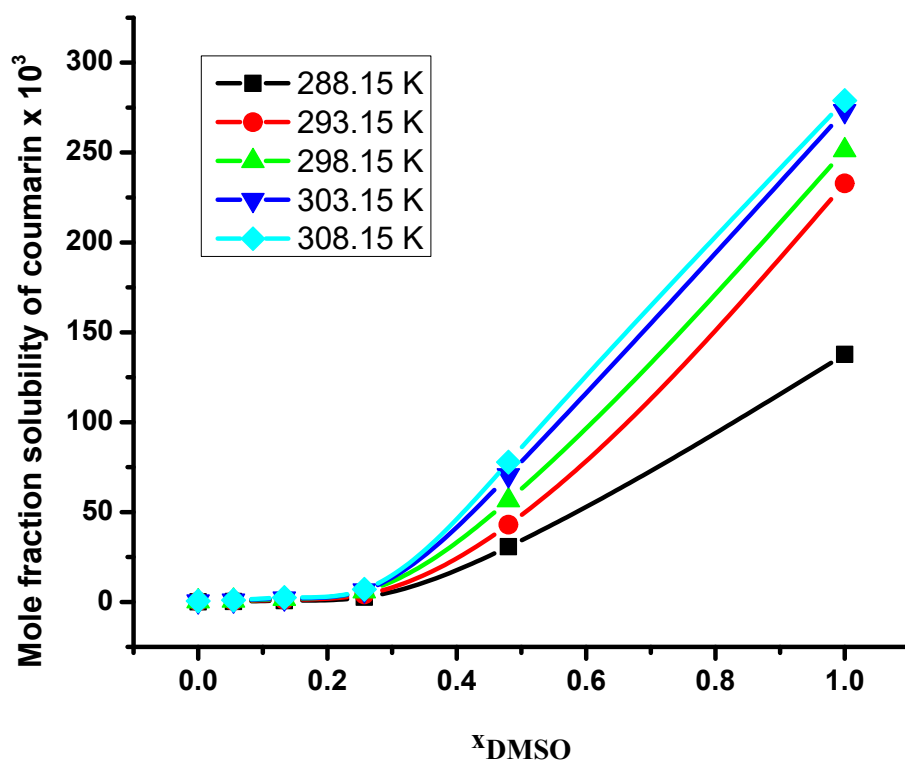

Figure S 3(b) Mole fraction solubility of coumarin in various temperatures (288.15 to 308.15 K) in pure water and with the variation of mole fraction concentration of dimethylsulfoxide ( $x_{\text{DMSO}}$ ).

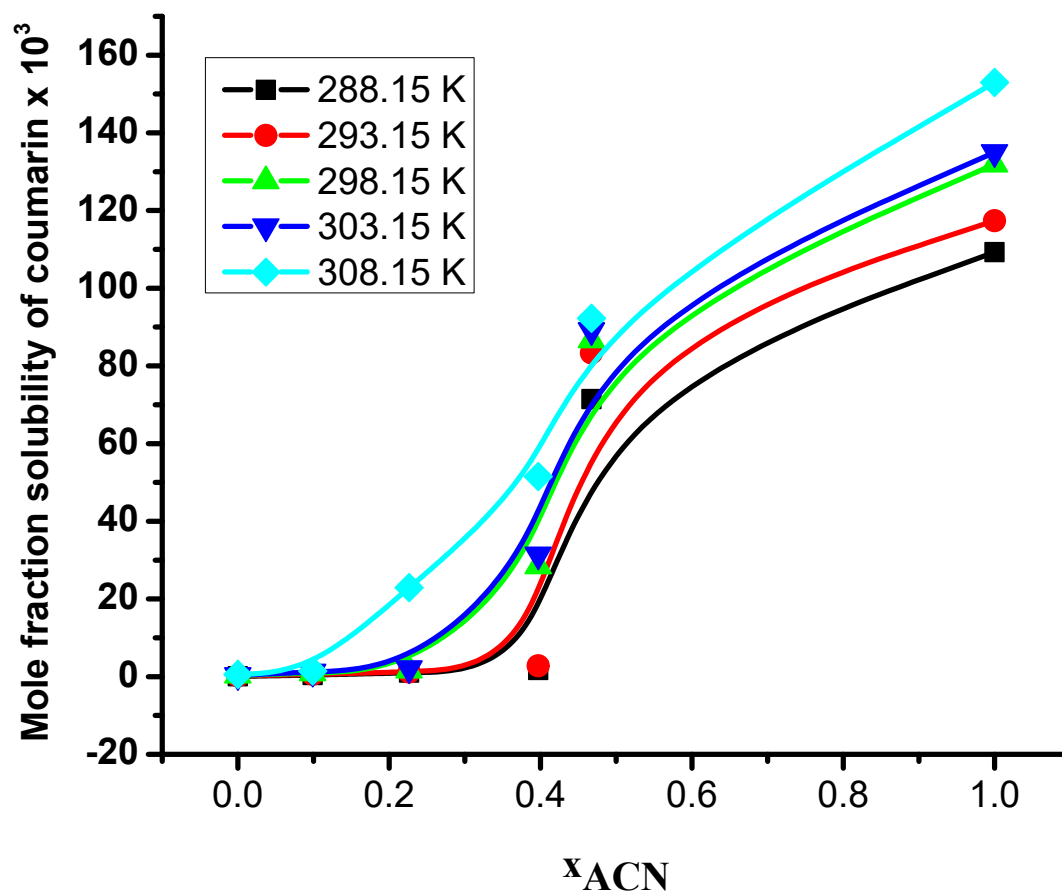

Figure S3 (c) Mole fraction solubility of coumarin in various temperatures (288.15 to 308.15 K) in pure water and with the variation of mole fraction concentration of acetonitrile ( $x_{ACN}$ ).

## References

- [1] S. Mondal, S. Roy, S. Ghosh, K. Mahali, B.K. Dolui, Study of the Solubility and Transfer Thermodynamics of d,l-Phenylalanine in Aqueous Sodium Chloride and d,l-Serine in Aqueous Sodium Nitrate Solutions, *Journal of Solution Chemistry*, 45 (2016) 1755-1772.
- [2] P.S. Guin, K. Mahali, B.K. Dolui, S. Roy, Solubility and Thermodynamics of Solute–Solvent Interactions of Some Amino Acids in Aqueous Sodium Bromide and Potassium Bromide Solutions, *Journal of Chemical & Engineering Data*, 63 (2018) 534-541.
- [3] A. Bhattacharyya, S.K. Bhattacharya, Chemical Transfer Energies of Some Homologous Amino Acids and the –CH<sub>2</sub>– Group in Aqueous DMF: Solvent Effect on Hydrophobic Hydration and Three Dimensional Solvent Structure, *Journal of Solution Chemistry*, 42 (2013) 2149-2167.
- [4] R. Sinha, K.K. Kundu, Transfer energetics of a series of homologous  $\alpha$ -amino acids and hence of –CH<sub>2</sub>– group—a possible probe for the solvent effect on hydrophobic hydration and the three-dimensional-structuredness of aqueous cosolvents, *Journal of Molecular Liquids*, 111 (2004) 151-159.
- [5] H. Talukdar, S. Rudra, K.K. Kundu, Thermodynamics of transfer of glycine, diglycine, and triglycine from water to aqueous solutions of urea, glycerol, and sodium nitrate, *Canadian Journal of Chemistry*, 66 (1988) 461-468.
- [6] A. Hossain, S. Roy, S. Ghosh, S. Mondal, B.K. Dolui, Solubility of dl-serine and dl-phenylalanine in aqueous mixtures of dimethyl sulfoxide and solvation thermodynamics, *RSC Advances*, 5 (2015) 69839-69847.
- [7] G. Graziano, On the Solvent Isotope Effect in Hydrophobic Hydration, *The Journal of Physical Chemistry B*, 104 (2000) 9249-9254.
- [8] S. Chowdhury, B. Ghosh, S. Baskey, A. Hossain, A.M.A. Henaish, S. Roy, K. Mahali, Solubility and thermodynamical phenomena for l-serine and l-isoleucine in chloride Salts of Na<sup>+</sup> and K<sup>+</sup> electrolytic media, *Journal of Molecular Liquids*, 378 (2023) 121619.
- [9] S. Roy, P.S. Guin, K. Mahali, A. Hossain, B.K. Dolui, Evaluation and correlation of solubility and solvation thermodynamics of glycine, dl-alanine and dl-valine in aqueous sodium sulphate solutions at two different temperatures, *Journal of Molecular Liquids*, 234 (2017) 124-128.
- [10] Gaussian 09, Revision A.02, M. J. Frisch et al., Gaussian, Inc., Wallingford, CT, 2009
- [11] A. Hossain, S. Roy, S. Ghosh, S. Mondal, B.K. Dolui, Solubility of dl-serine and dl-phenylalanine in aqueous mixtures of dimethyl sulfoxide and solvation thermodynamics, *RSC Advances*, 5 (2015) 69839-69847.
- [12] S. Imran, A. Hossain, K. Mahali, P.S. Guin, A. Datta, S. Roy, Solubility and peculiar thermodynamical behaviour of 2-aminobenzoic acid in aqueous binary solvent mixtures at 288.15 to 308.15 K, *Journal of Molecular Liquids*, 302 (2020) 112566.
- [13] K. Mahali, Thermodynamic solvation of a series of homologous  $\alpha$ -amino acids in non-aqueous mixture of ethylene-glycol and N,N-dimethyl formamide, *Journal of Biophysical Chemistry*, 02 (2011) 185-193.
- [14] Y. Marcus, *Ion Solvation*, Wiley, 1985.
